# Supplementary material
Source: publisher figshare collection journal article supplement (https://geolsoc.figshare.com/ndownloader/files/5427227)
Supplement: Supplementary file 1 [file 5427227]

Analysis	U	206Pb	U/Th	206Pb*	�	207Pb*	�	206Pb*	�	error	206Pb*	�	207Pb*	�	206Pb*	�	Best age	�	Conc
	(ppm)	204Pb		207Pb*	(%)	235U*	(%)	238U	(%)	corr.	238U*	(Ma)	235U	(Ma)	207Pb*	(Ma)	(Ma)	(Ma)	(%)
Sample 170
170B-1	349	48105	3.6	17.5492	2.6	0.6104	2.8	0.0777	1.0	0.36	482.4	4.6	483.8	10.7	490.8	56.9	482.4	4.6	98.3
170B-2	286	37785	3.7	17.2458	2.5	0.6411	2.6	0.0802	1.0	0.38	497.3	4.8	503.0	10.5	529.2	53.7	497.3	4.8	94.0
170B-3	580	82055	2.8	17.6109	2.0	0.6414	2.2	0.0819	1.0	0.45	507.6	4.9	503.2	8.7	483.1	43.3	507.6	4.9	105.1
170B-4	377	62710	3.5	17.1942	1.6	0.6551	1.8	0.0817	1.0	0.54	506.2	4.9	511.6	7.4	535.7	33.9	506.2	4.9	94.5
170B-5	620	36570	2.5	16.9733	2.6	0.6831	3.9	0.0841	2.9	0.74	520.5	14.4	528.7	15.9	564.0	56.4	520.5	14.4	92.3
170B-6	344	59140	3.0	16.9263	2.7	0.6958	3.5	0.0854	2.2	0.64	528.4	11.2	536.3	14.4	570.0	57.9	528.4	11.2	92.7
170B-7	467	64855	2.3	17.1142	1.5	0.7186	2.3	0.0892	1.8	0.78	550.7	9.5	549.8	9.8	545.9	31.9	550.7	9.5	100.9
170B-8	899	114735	2.7	17.5141	1.7	0.6317	2.1	0.0802	1.3	0.61	497.5	6.3	497.1	8.4	495.3	37.0	497.5	6.3	100.5
170B-9	326	57880	2.6	17.1382	1.8	0.7199	2.0	0.0895	1.0	0.49	552.5	5.3	550.6	8.6	542.9	38.7	552.5	5.3	101.8
170B-10	334	46570	3.8	17.2727	2.0	0.6491	2.2	0.0813	1.0	0.45	504.0	4.8	507.9	8.9	525.8	43.4	504.0	4.8	95.9
170B-11	266	42005	4.2	17.3964	1.6	0.6954	1.9	0.0877	1.0	0.52	542.1	5.2	536.0	8.0	510.1	36.1	542.1	5.2	106.3
170B-12	291	51345	4.0	17.4690	2.7	0.6876	3.3	0.0871	1.9	0.58	538.5	10.0	531.4	13.8	500.9	59.5	538.5	10.0	107.5
170B-13	287	29465	3.1	16.5065	4.6	0.7144	4.7	0.0855	1.0	0.21	529.0	5.1	547.4	20.1	624.4	100.1	529.0	5.1	84.7
170B-14	283	46270	4.2	17.0511	2.0	0.6820	3.3	0.0843	2.6	0.79	521.9	13.0	528.0	13.5	554.0	43.5	521.9	13.0	94.2
170B-15	353	53430	3.1	17.1679	3.2	0.7169	3.4	0.0893	1.1	0.33	551.2	5.9	548.8	14.3	539.1	69.6	551.2	5.9	102.2
170B-16	252	42230	3.9	17.1222	2.7	0.6820	3.1	0.0847	1.5	0.47	524.1	7.3	528.0	12.8	544.9	59.7	524.1	7.3	96.2
170B-17	381	48740	3.4	17.0015	1.8	0.6706	2.0	0.0827	1.0	0.51	512.1	5.1	521.1	8.3	560.4	38.1	512.1	5.1	91.4
170B-18	341	58345	3.5	16.9918	2.4	0.7091	3.2	0.0874	2.1	0.65	540.1	10.7	544.2	13.3	561.6	52.3	540.1	10.7	96.2
170B-19	315	18505	3.5	16.4146	3.9	0.7092	4.0	0.0844	1.0	0.25	522.5	5.0	544.3	17.0	636.4	84.1	522.5	5.0	82.1
170B-20	507	74345	2.7	17.3520	1.5	0.6806	2.1	0.0857	1.5	0.70	529.8	7.4	527.2	8.6	515.7	32.7	529.8	7.4	102.7
Sample 290
RO290-1	314	19460	3.1	17.8391	1.6	0.5973	4.0	0.0773	3.7	0.92	479.9	17.0	475.5	15.2	454.6	35.6	479.9	17.0	105.6
RO290-2	436	8350	3.5	16.5967	3.7	0.6504	3.9	0.0783	1.2	0.31	485.9	5.6	508.8	15.7	612.6	80.6	485.9	5.6	79.3
RO290-3	585	28318	2.7	17.3590	2.7	0.6538	2.8	0.0823	0.7	0.24	509.9	3.3	510.8	11.3	514.8	60.2	509.9	3.3	99.0
RO290-4	381	14014	2.2	16.1555	7.2	0.7133	7.3	0.0836	1.2	0.16	517.4	5.7	546.7	30.9	670.6	154.5	517.4	5.7	77.2
RO290-5	1086	29398	1.9	17.4074	2.8	0.6293	4.7	0.0794	3.8	0.81	492.8	17.8	495.7	18.3	508.7	60.8	492.8	17.8	96.9
RO290-6	408	24810	2.8	17.4697	2.2	0.6403	2.5	0.0811	1.2	0.48	502.8	5.8	502.5	9.9	500.9	48.2	502.8	5.8	100.4
RO290-7	858	29738	3.8	17.1050	1.8	0.6866	2.2	0.0852	1.2	0.57	527.0	6.2	530.8	9.0	547.1	39.2	527.0	6.2	96.3
RO290-8	548	57266	2.0	17.4216	1.5	0.6504	1.7	0.0822	0.7	0.39	509.1	3.2	508.7	6.7	506.9	33.9	509.1	3.2	100.4
RO290-9	829	91106	4.4	17.3788	2.8	0.6571	2.8	0.0828	0.6	0.21	513.0	3.0	512.9	11.5	512.3	61.2	513.0	3.0	100.1
RO290-10	319	39422	9.8	18.0428	3.1	0.5323	3.8	0.0697	2.1	0.56	434.1	8.9	433.3	13.3	429.3	69.3	434.1	8.9	101.1
RO290-11	455	23652	10.0	17.8280	2.8	0.5573	3.3	0.0721	1.8	0.53	448.5	7.6	449.7	12.0	456.0	62.3	448.5	7.6	98.4
RO290-12	238	5582	3.4	16.8557	6.8	0.6732	7.5	0.0823	3.2	0.43	509.9	15.9	522.7	30.7	579.1	147.2	509.9	15.9	88.0
RO290-13	269	17000	4.7	16.5464	6.2	0.6843	6.5	0.0821	1.8	0.27	508.7	8.6	529.3	26.7	619.2	134.7	508.7	8.6	82.2
RO290-14	192	16912	3.1	17.7013	5.1	0.6283	5.1	0.0807	0.8	0.16	500.1	3.9	495.0	20.2	471.8	112.6	500.1	3.9	106.0
RO290-15	1023	56180	1.5	17.4768	1.5	0.6186	3.4	0.0784	3.0	0.89	486.6	14.2	489.0	13.1	500.0	33.4	486.6	14.2	97.3
RO290-16	299	8102	3.5	16.6425	7.2	0.6514	7.3	0.0786	1.6	0.21	487.9	7.3	509.3	29.3	606.7	154.9	487.9	7.3	80.4
RO290-17	1604	118410	2.4	17.4413	1.3	0.6574	2.6	0.0832	2.2	0.86	514.9	11.0	513.0	10.4	504.5	29.5	514.9	11.0	102.1
RO290-18	758	11378	2.7	17.3002	1.1	0.6172	3.0	0.0774	2.8	0.93	480.8	12.8	488.1	11.5	522.3	24.0	480.8	12.8	92.1
RO290-19	623	22180	3.6	16.6888	2.1	0.7253	3.4	0.0878	2.7	0.79	542.5	14.2	553.8	14.6	600.7	45.1	542.5	14.2	90.3
RO290-20	2597	478334	2.1	17.5369	1.1	0.6396	2.5	0.0814	2.3	0.90	504.2	10.9	502.1	9.9	492.4	23.4	504.2	10.9	102.4
RO290-21	798	22560	3.1	17.6861	1.4	0.6230	2.3	0.0799	1.8	0.79	495.6	8.8	491.7	9.1	473.7	31.6	495.6	8.8	104.6
RO290-22	699	24660	3.5	17.1334	1.9	0.7009	2.7	0.0871	1.9	0.70	538.3	9.7	539.3	11.2	543.5	41.7	538.3	9.7	99.1
RO290-23	1475	37196	2.3	17.2234	1.5	0.6553	1.7	0.0819	0.8	0.48	507.2	3.9	511.8	6.7	532.1	31.9	507.2	3.9	95.3
RO290-24	313	9584	2.5	16.1779	7.9	0.6408	10.0	0.0752	6.2	0.62	467.3	27.9	502.8	39.8	667.6	169.3	467.3	27.9	70.0
RO290-25	897	7384	3.6	16.7929	1.2	0.5646	4.2	0.0688	4.0	0.96	428.7	16.7	454.5	15.4	587.2	25.6	428.7	16.7	73.0
RO290-26	1759	7984	3.0	16.2217	2.5	0.5367	5.5	0.0631	4.9	0.89	394.7	18.8	436.3	19.6	661.8	54.4	394.7	18.8	59.6
RO290-27	1911	41378	2.3	17.4460	2.8	0.6532	3.3	0.0826	1.7	0.52	511.9	8.5	510.4	13.3	503.8	62.3	511.9	8.5	101.6
RO290-28	1236	18950	1.9	17.0972	1.6	0.6532	2.7	0.0810	2.2	0.81	502.1	10.4	510.5	10.8	548.2	34.7	502.1	10.4	91.6
Sample 291
RO291-1	1086	179400	3.7	17.2866	1.0	0.6404	1.1	0.0803	0.5	0.47	497.9	2.4	502.6	4.3	524.0	20.8	497.9	2.4	95.0
RO291-2	841	80094	4.7	17.4544	3.8	0.6297	4.4	0.0797	2.3	0.53	494.4	11.1	495.9	17.4	502.8	82.8	494.4	11.1	98.3
RO291-3	676	164648	5.1	17.4558	2.7	0.6405	3.6	0.0811	2.4	0.67	502.6	11.7	502.6	14.4	502.6	59.5	502.6	11.7	100.0
RO291-4	770	178870	4.2	17.6123	3.6	0.6278	3.7	0.0802	0.9	0.23	497.2	4.2	494.7	14.7	483.0	80.4	497.2	4.2	103.0
RO291-5	918	179836	3.7	17.5069	1.5	0.6327	2.0	0.0803	1.3	0.67	498.1	6.4	497.8	7.9	496.2	33.1	498.1	6.4	100.4
RO291-6	459	17120	5.3	17.0291	1.6	0.6668	1.8	0.0823	0.9	0.47	510.1	4.2	518.7	7.4	556.8	35.1	510.1	4.2	91.6
RO291-7	759	33308	4.0	17.4481	3.6	0.6461	4.2	0.0818	2.1	0.50	506.6	10.2	506.1	16.6	503.6	79.4	506.6	10.2	100.6
RO291-8	929	195408	3.9	17.5152	1.5	0.6203	2.7	0.0788	2.2	0.82	488.9	10.3	490.0	10.3	495.2	33.3	488.9	10.3	98.7
RO291-9	964	58640	3.9	17.3232	1.2	0.6287	2.2	0.0790	1.9	0.84	490.1	8.9	495.3	8.7	519.4	26.4	490.1	8.9	94.4
RO291-10	442	4856	5.2	15.6582	8.5	0.6869	8.8	0.0780	2.2	0.25	484.2	10.0	530.9	36.2	737.2	180.0	484.2	10.0	65.7
RO291-11	470	80464	4.8	17.3698	3.4	0.6231	3.8	0.0785	1.6	0.43	487.1	7.6	491.8	14.7	513.5	74.8	487.1	7.6	94.9
RO291-12	990	217976	3.5	17.4542	2.9	0.6355	3.2	0.0804	1.5	0.46	498.8	7.1	499.5	12.7	502.8	62.8	498.8	7.1	99.2
RO291-13	1047	331684	3.0	17.6423	1.1	0.6288	2.5	0.0805	2.3	0.90	498.8	10.9	495.3	9.9	479.2	24.5	498.8	10.9	104.1
RO291-14	594	534296	5.6	18.0295	4.3	0.6031	4.8	0.0789	2.2	0.46	489.3	10.4	479.2	18.3	431.0	95.0	489.3	10.4	113.5
RO291-15	809	186294	4.4	17.4334	2.3	0.6583	2.4	0.0832	0.5	0.21	515.4	2.5	513.6	9.6	505.5	51.1	515.4	2.5	102.0
RO291-16	991	189954	3.2	17.1391	2.4	0.6366	2.6	0.0791	0.9	0.36	491.0	4.4	500.2	10.2	542.8	52.7	491.0	4.4	90.5
RO291-17	548	70932	4.6	17.1438	3.0	0.6496	3.5	0.0808	1.7	0.48	500.7	8.0	508.2	13.8	542.2	66.3	500.7	8.0	92.4
RO291-18	1022	91496	3.7	17.3586	2.2	0.6335	3.1	0.0798	2.2	0.70	494.7	10.3	498.3	12.1	514.9	48.1	494.7	10.3	96.1
RO291-19	454	38788	6.1	17.2107	2.6	0.6698	2.7	0.0836	0.8	0.30	517.6	4.0	520.6	11.0	533.6	56.6	517.6	4.0	97.0
RO291-20	788	107010	4.2	17.5511	2.2	0.6236	2.3	0.0794	0.8	0.35	492.5	3.8	492.1	9.0	490.6	47.5	492.5	3.8	100.4
RO291-21	492	49946	5.6	17.3901	2.8	0.6409	3.1	0.0808	1.4	0.44	501.1	6.7	502.8	12.5	510.9	62.1	501.1	6.7	98.1
RO291-22	488	16188	4.6	17.2408	3.8	0.6583	3.9	0.0823	0.8	0.21	509.9	4.0	513.6	15.5	529.9	82.6	509.9	4.0	96.2
RO291-23	818	79362	4.3	17.6672	1.8	0.6559	3.3	0.0840	2.8	0.84	520.2	13.9	512.1	13.4	476.1	40.2	520.2	13.9	109.3
RO291-24	809	160362	4.6	17.5139	2.5	0.6338	2.9	0.0805	1.4	0.48	499.1	6.7	498.5	11.4	495.3	55.8	499.1	6.7	100.8
RO291-25	684	40892	5.0	17.1221	3.3	0.6246	4.1	0.0776	2.3	0.58	481.6	10.9	492.7	15.8	545.0	72.5	481.6	10.9	88.4
RO291-26	668	45136	5.1	17.7223	3.5	0.5896	4.0	0.0758	1.9	0.47	470.9	8.6	470.6	15.1	469.2	78.0	470.9	8.6	100.4
RO291-27	879	108518	4.1	17.3764	2.6	0.6458	3.2	0.0814	1.9	0.60	504.4	9.4	505.9	12.7	512.6	56.1	504.4	9.4	98.4
RO291-28	973	143432	4.2	17.5038	1.5	0.6334	1.8	0.0804	1.0	0.54	498.5	4.6	498.2	6.9	496.6	32.4	498.5	4.6	100.4
Sample 327
327-1	310	43335	3.3	17.9102	2.4	0.5875	2.6	0.0763	0.9	0.34	474.1	4.0	469.2	9.7	445.8	53.8	474.1	4.0	106.3
327-2	198	20586	2.9	16.8947	3.1	0.6376	3.9	0.0781	2.2	0.58	484.9	10.5	500.8	15.2	574.1	68.2	484.9	10.5	84.5
327-3	217	19356	3.6	13.5204	44.9	0.7465	45.7	0.0732	8.5	0.18	455.4	37.2	566.2	201.0	1040.4	956.1	455.4	37.2	43.8
327-4	473	88755	2.5	18.0107	2.6	0.5748	2.7	0.0751	0.7	0.25	466.7	3.0	461.1	10.0	433.3	58.0	466.7	3.0	107.7
327-6	385	29340	2.3	17.8481	2.4	0.5996	2.5	0.0776	0.5	0.20	481.9	2.3	477.0	9.4	453.5	53.5	481.9	2.3	106.3
327-7	374	108159	2.7	17.7810	2.3	0.6061	2.4	0.0782	0.8	0.31	485.1	3.6	481.1	9.4	461.8	51.5	485.1	3.6	105.0
327-8	299	46479	1.9	17.9354	3.3	0.6236	3.5	0.0811	1.3	0.37	502.8	6.2	492.1	13.7	442.6	72.6	502.8	6.2	113.6
327-9	181	36354	5.8	17.5526	4.0	0.6244	4.2	0.0795	1.1	0.27	493.1	5.4	492.6	16.3	490.4	88.8	493.1	5.4	100.5
327-10	459	73605	4.2	17.4980	2.0	0.5990	2.1	0.0760	0.5	0.24	472.3	2.3	476.6	8.0	497.3	44.8	472.3	2.3	95.0
327-11	337	60633	4.7	17.5059	1.2	0.6162	1.5	0.0782	1.0	0.62	485.6	4.5	487.5	6.0	496.3	26.8	485.6	4.5	97.8
327-12	431	50679	3.4	17.4538	1.3	0.6260	1.4	0.0792	0.5	0.35	491.6	2.4	493.6	5.5	502.9	29.1	491.6	2.4	97.8
327-14	306	42555	4.3	18.0208	2.0	0.5760	2.2	0.0753	1.0	0.44	467.9	4.4	461.9	8.3	432.1	44.8	467.9	4.4	108.3
327-15	237	28878	3.7	17.9437	4.3	0.5782	4.5	0.0753	1.2	0.27	467.7	5.6	463.3	16.8	441.6	96.5	467.7	5.6	105.9
327-16	206	45465	5.7	18.2028	3.4	0.5737	3.4	0.0757	0.7	0.21	470.6	3.2	460.4	12.7	409.6	75.1	470.6	3.2	114.9
327-17	217	146181	6.3	17.4444	3.7	0.5961	3.9	0.0754	1.2	0.30	468.7	5.2	474.8	14.9	504.0	82.3	468.7	5.2	93.0
327-18	194	15195	7.1	16.9725	4.1	0.6145	4.2	0.0756	0.5	0.12	470.0	2.3	486.4	16.1	564.1	90.3	470.0	2.3	83.3
327-20	230	44487	5.4	18.2631	3.4	0.5569	3.5	0.0738	1.0	0.28	458.8	4.3	449.5	12.7	402.2	75.1	458.8	4.3	114.1
327-21	508	161604	2.4	17.8586	3.0	0.5626	3.2	0.0729	0.9	0.28	453.4	3.9	453.2	11.6	452.2	67.5	453.4	3.9	100.3
Sample 328B
328-B-2	272	28080	4.6	16.8499	2.7	0.6744	3.0	0.0824	1.1	0.39	510.5	5.6	523.4	12.1	579.8	59.2	510.5	5.6	88.0
328-B-3	644	34968	4.3	16.7753	1.6	0.7905	2.1	0.0962	1.3	0.63	592.0	7.5	591.5	9.4	589.5	35.5	592.0	7.5	100.4
328-B-4	146	111279	1.2	4.4091	5.6	16.3244	6.0	0.5220	2.2	0.36	2707.7	47.5	2896.0	57.4	3029.6	89.7	3029.6	89.7	89.4
328-B-5	654	128853	13.9	7.9640	2.5	6.5475	3.0	0.3782	1.7	0.56	2067.8	29.7	2052.3	26.3	2036.8	43.7	2036.8	43.7	101.5
328-B-6	603	19356	1.7	16.7824	3.0	0.7489	3.2	0.0912	1.2	0.38	562.4	6.6	567.6	14.1	588.6	65.0	562.4	6.6	95.5
328-B-8	237	123426	2.5	7.2467	3.4	7.8928	5.1	0.4148	3.8	0.74	2237.0	71.8	2218.9	46.1	2202.2	59.4	2202.2	59.4	101.6
328-B-9	492	22467	6.0	16.4729	1.6	0.8441	2.6	0.1008	2.0	0.78	619.3	11.8	621.4	11.9	628.8	34.7	619.3	11.8	98.5
328-B-10	263	30846	2.8	5.8218	1.6	11.2704	3.3	0.4759	2.9	0.88	2509.3	61.1	2545.8	31.1	2574.9	26.1	2574.9	26.1	97.4
328-B-11	443	32286	1.3	16.4779	1.7	0.8667	2.0	0.1036	1.1	0.55	635.4	6.7	633.8	9.5	628.2	36.4	635.4	6.7	101.1
328-B-13	885	47397	3.9	17.4896	2.2	0.6578	2.9	0.0834	1.9	0.65	516.7	9.5	513.3	11.8	498.3	49.2	516.7	9.5	103.7
328-B-14	200	15624	6.3	17.2130	3.9	0.6693	4.0	0.0836	1.0	0.24	517.3	4.8	520.3	16.4	533.4	85.9	517.3	4.8	97.0
328-B-16	1075	4101	1.8	15.1670	4.3	0.6806	5.8	0.0749	3.9	0.67	465.4	17.4	527.1	23.8	804.2	90.1	465.4	17.4	57.9
328-B-17	252	31332	4.8	16.9047	5.4	0.7179	5.5	0.0880	1.1	0.19	543.8	5.5	549.4	23.4	572.8	117.6	543.8	5.5	94.9
328-B-18	119	34710	3.2	17.0996	4.5	0.7643	4.7	0.0948	1.4	0.29	583.8	7.6	576.5	20.8	547.8	98.7	583.8	7.6	106.6
328-B-19	448	5994	3.9	15.3028	5.1	0.8200	5.2	0.0910	0.7	0.13	561.5	3.6	608.0	23.7	785.5	107.8	561.5	3.6	71.5
328-B-20	539	113415	4.7	17.1373	2.2	0.7413	2.4	0.0921	1.0	0.42	568.1	5.5	563.2	10.4	543.0	47.7	568.1	5.5	104.6
328-B-21	1341	176160	4.7	5.9016	4.9	11.1415	5.1	0.4769	1.3	0.26	2513.7	27.9	2535.0	47.3	2552.2	81.9	2552.2	81.9	98.5
328-B-22	285	4047	4.2	15.4228	5.6	0.7751	8.9	0.0867	6.9	0.78	536.0	35.4	582.7	39.3	769.1	117.1	536.0	35.4	69.7
328-B-23	89	80775	6.3	5.0444	1.9	15.1332	3.0	0.5537	2.3	0.76	2840.4	52.6	2823.7	28.6	2811.7	31.7	2811.7	31.7	101.0
328-B-25	222	80733	1.3	7.3444	1.3	7.6229	1.4	0.4060	0.5	0.37	2196.8	9.3	2187.6	12.3	2178.9	22.1	2178.9	22.1	100.8
328-B-26	260	9714	2.7	15.3456	2.6	0.9950	3.0	0.1107	1.4	0.46	677.0	8.8	701.3	15.1	779.7	55.6	677.0	8.8	86.8
328-B-28	408	5376	1.4	14.9465	3.6	1.0581	3.8	0.1147	1.2	0.32	700.0	8.2	732.9	20.0	834.8	75.7	700.0	8.2	83.9
328-B-29	708	2991	2.7	14.7348	2.8	0.7692	3.1	0.0822	1.5	0.48	509.3	7.3	579.3	13.9	864.5	57.4	509.3	7.3	58.9
328-B-30	93	9303	3.0	7.3461	1.5	6.0278	3.9	0.3212	3.7	0.93	1795.4	57.2	1979.9	34.3	2178.5	25.8	2178.5	25.8	82.4
328-B-31	417	8919	1.8	15.5386	2.5	0.8949	3.2	0.1008	2.0	0.61	619.4	11.5	649.0	15.4	753.3	53.7	619.4	11.5	82.2
328-B-32	127	15618	1.4	8.8136	2.1	5.3209	2.6	0.3401	1.6	0.60	1887.3	25.5	1872.2	22.2	1855.5	37.6	1855.5	37.6	101.7
328-B-33	199	3648	2.5	11.7551	23.1	1.0629	23.8	0.0906	5.6	0.23	559.2	29.9	735.3	125.1	1317.1	454.4	559.2	29.9	42.5
RO-328B-1	668	11364	1.9	16.4894	2.8	0.7856	2.9	0.0940	0.6	0.22	578.9	3.5	588.7	13.0	626.7	61.0	578.9	3.5	92.4
RO-328B-2	346	21126	4.4	17.0588	3.0	0.6172	3.2	0.0764	1.0	0.32	474.3	4.6	488.1	12.3	553.0	65.6	474.3	4.6	85.8
RO-328B-3	308	26102	3.1	16.4362	2.3	0.8568	2.7	0.1021	1.4	0.54	626.9	8.6	628.4	12.5	633.6	48.6	626.9	8.6	98.9
RO-328B-5	1361	3162	3.5	13.6086	20.1	0.8816	20.2	0.0870	2.1	0.10	537.9	10.8	641.9	96.6	1027.3	411.1	537.9	10.8	52.4
RO-328B-6	557	67370	1.9	16.4628	2.6	0.8079	4.3	0.0965	3.4	0.79	593.7	19.2	601.3	19.4	630.2	56.5	593.7	19.2	94.2
RO-328B-4	350	69662	4.7	16.4238	3.7	0.7484	3.8	0.0891	0.9	0.24	550.5	4.9	567.3	16.6	635.3	79.7	550.5	4.9	86.6
RO-328B-8	599	15040	4.2	17.3850	1.9	0.6191	3.1	0.0781	2.5	0.80	484.5	11.7	489.3	12.2	511.6	41.5	484.5	11.7	94.7
RO-328B-9	303	19920	2.1	16.6518	4.2	0.7858	4.3	0.0949	0.8	0.18	584.5	4.4	588.8	19.2	605.5	91.2	584.5	4.4	96.5
RO-328B-10	880	58200	2.7	16.6188	2.0	0.7564	2.3	0.0912	1.2	0.51	562.5	6.2	571.9	9.9	609.8	42.4	562.5	6.2	92.2
RO-328B-11	130	28078	1.3	16.2396	2.7	0.9067	5.8	0.1068	5.1	0.88	654.1	31.6	655.3	27.8	659.5	58.2	654.1	31.6	99.2
RO-328B-12	1460	235192	2.1	5.8030	1.7	10.5393	1.9	0.4436	0.8	0.42	2366.6	15.5	2483.4	17.3	2580.3	28.4	2580.3	28.4	91.7
RO-328B-13	365	26478	2.4	16.8727	3.0	0.6936	4.6	0.0849	3.5	0.75	525.2	17.4	534.9	19.1	577.0	65.6	525.2	17.4	91.0
RO-328B-14	575	5416	1.5	13.1745	17.2	0.9666	17.3	0.0924	1.2	0.07	569.5	6.3	686.7	86.3	1092.5	347.4	569.5	6.3	52.1
RO-328B-16	318	13954	9.2	16.1258	6.5	0.7721	7.0	0.0903	2.4	0.34	557.3	12.7	581.0	30.8	674.5	140.1	557.3	12.7	82.6
RO-328B-17	315	50034	2.8	16.4160	3.1	0.7881	3.6	0.0938	1.9	0.52	578.2	10.6	590.1	16.3	636.3	66.8	578.2	10.6	90.9
RO-328B-18	786	55076	2.3	16.2064	1.7	0.8584	3.0	0.1009	2.5	0.83	619.7	14.8	629.2	14.2	663.9	36.4	619.7	14.8	93.3
Sample 328
RO-328-1	249	5368	10.3	19.1606	5.9	0.4872	6.8	0.0677	3.4	0.50	422.3	13.7	403.0	22.5	293.8	134.0	422.3	13.7	143.8
RO-328-2	1426	14636	3.4	18.0823	2.7	0.5931	3.7	0.0778	2.5	0.68	482.9	11.7	472.9	14.0	424.5	60.5	482.9	11.7	113.8
RO-328-3	1369	4788	2.9	17.8602	2.9	0.5824	4.0	0.0754	2.8	0.70	468.9	12.7	466.0	15.0	452.0	63.5	468.9	12.7	103.7
RO-328-4	1024	93498	3.4	17.8840	2.8	0.6253	4.0	0.0811	2.9	0.71	502.7	13.9	493.2	15.8	449.0	62.9	502.7	13.9	112.0
RO-328-5	2400	15856	2.6	17.9332	3.1	0.6001	4.1	0.0781	2.6	0.64	484.5	12.2	477.3	15.5	442.9	69.1	484.5	12.2	109.4
RO-328-6	1681	8146	2.7	17.7485	1.9	0.6115	2.4	0.0787	1.5	0.61	488.5	6.8	484.5	9.1	465.9	41.6	488.5	6.8	104.8
RO-328-7	3006	18720	1.9	17.6055	1.6	0.6056	3.2	0.0773	2.8	0.86	480.2	12.9	480.8	12.4	483.8	36.3	480.2	12.9	99.2
RO-328-8	4106	38608	1.5	17.9987	2.6	0.5962	3.1	0.0778	1.7	0.55	483.1	8.0	474.8	11.8	434.8	57.7	483.1	8.0	111.1
RO-328-9	3061	57506	1.9	18.2186	2.9	0.5594	3.2	0.0739	1.4	0.42	459.7	6.1	451.1	11.8	407.7	65.4	459.7	6.1	112.8
RO-328-10	3761	52048	3.6	17.5893	2.1	0.6256	2.3	0.0798	0.9	0.41	494.9	4.5	493.3	9.0	485.8	46.2	494.9	4.5	101.9
RO-328-11	3364	53012	2.0	17.9111	1.7	0.5824	3.2	0.0757	2.7	0.85	470.1	12.4	466.0	12.1	445.6	38.1	470.1	12.4	105.5
RO-328-12	2365	29014	2.7	17.9783	3.8	0.6010	3.9	0.0784	1.1	0.27	486.3	4.9	477.8	14.9	437.3	84.0	486.3	4.9	111.2
